# Supplementary material
Source: PubMed Central journal article supplement (PMC8279954)
Supplement: mmc1.pdf [file mmc1.pdf]

## SUPPLEMENTARY APPENDIX

| <b>Table of Contents</b>           |      |
|------------------------------------|------|
| Investigators                      | 2    |
| Material and Methods               |      |
| • Autopsy technique                | 3    |
| • Histology                        | 3    |
| • Immunohistochemistry             | 3    |
| • In-situ hybridization            | 3    |
| • TUNEL assay                      | 4    |
| • Transmission electron microscopy | 4    |
| • Mass Cytometry                   | 4    |
| • Gene expression analysis         | 5    |
| • Proteomics                       | 6    |
| • Tables                           | 8-10 |

## SUPPLEMENTARY APPENDIX

### INVESTIGATORS

Mariam P. Alexander, MD<sup>1</sup>, Kiran K. Mangalaparthy<sup>1,2,3</sup>, Anil K. Madugundu<sup>1,2,4,5</sup>, Ann M. Moyer, MD, PhD<sup>1</sup>, Benjamin A. Adam, MD<sup>6</sup>, Michael Mengel, MD<sup>6</sup>, Smrita Singh, MBBS<sup>1,2,4,5</sup>, Sandra M. Herrmann, MD<sup>7</sup>, Andrew D. Rule, MD<sup>7</sup>, E. Heidi Cheek, MHS<sup>1</sup>, Loren P Herrera Hernandez, MD<sup>1</sup>, Rondell P. Graham, MBBS<sup>1</sup>, Aleksander Denic, MD, PhD<sup>7</sup>, Marie-Christine Aubry, MD<sup>1</sup>, Anja C. Roden, MD<sup>1</sup>, Catherine E. Hagen, MD<sup>1</sup>; Reade A. Quinton, MD<sup>1</sup>, Melanie C. Bois, MD<sup>1</sup>, Peter T. Lin, MD<sup>1</sup>, Joseph J. Maleszewski, MD<sup>1</sup>, Lynn D. Cornell, MD<sup>1</sup>, Sanjeev Sethi, MD<sup>1</sup>, Kevin D. Pavelko, PhD<sup>8</sup>, Jon Charlesworth<sup>9</sup>, Ramya Narasimhan, MBBS<sup>10</sup>, Christopher P. Larsen, MD<sup>11</sup>, Stacey A. Rizza, MD<sup>12</sup>, Samih H. Nasr, MD<sup>1</sup>, Joseph P. Grande, MD<sup>1</sup>, Trevor D. McKee PhD<sup>13</sup>, Andrew D. Badley, MD<sup>12,14#</sup>, Akhilesh Pandey, MD, PhD<sup>1,5,15#</sup>, Timucin Taner, MD, PhD<sup>16,17#</sup>

<sup>1</sup>Department of Laboratory Medicine and Pathology, Mayo Clinic, Rochester, MN, USA; <sup>2</sup>Institute of Bioinformatics, International Technology Park, Karnataka, India; <sup>3</sup>Amrita School of Biotechnology, Kerala, India; <sup>4</sup>Manipal Academy of Higher Education, Manipal, Karnataka, India; <sup>5</sup>Center for Molecular Medicine, National Institute of Mental Health and Neurosciences, Karnataka, India; <sup>6</sup>Department of Laboratory Medicine and Pathology, University of Alberta, Edmonton, AB, Canada; <sup>7</sup>Division of Nephrology and Hypertension, Mayo Clinic, Rochester, MN, USA; <sup>8</sup>Medical Genome Facility, Proteomics Core, Mayo Clinic, Rochester, MN, USA; <sup>9</sup>Microscopy and Cell Analysis Core, Mayo Clinic, Rochester, MN, USA; <sup>10</sup>Department of Endocrinology, Mayo Clinic, Rochester, MN, USA; <sup>11</sup>Nephropathology Associates, Little Rock, Arkansas, USA; <sup>12</sup>Division of Infectious Diseases, Department of Internal Medicine, Mayo Clinic, Rochester, MN, USA; <sup>13</sup> STTARR Innovation Core Facility, University Health Network, Toronto ON <sup>14</sup>Department of Molecular Medicine, Mayo Clinic, Rochester, MN, USA; <sup>14</sup>Center for Individualized Medicine, Mayo Clinic, Rochester, MN USA; <sup>16</sup>Department of Surgery, Mayo Clinic, Rochester, MN, USA; <sup>17</sup>Department of Immunology, Mayo Clinic, Rochester, MN, USA

\*# Authors contributed equally.

## SUPPLEMENTARY APPENDIX

### MATERIALS AND METHODS

#### **Autopsies:**

All COVID-19 autopsies, as confirmed by antemortem SARS-CoV-2 nasopharyngeal or oropharyngeal polymerase chain reaction (PCR), were performed at Mayo Clinic's Department of Laboratory Medicine and Pathology in Rochester, Minnesota. The study was approved by the Institutional Review Board and the COVID-19 Research Task Force. Kidney samples obtained at autopsy were immediately fixed in glutaraldehyde and then submitted for ultrastructural studies. Urine when available, was collected.

#### **Histology**

Sections of kidneys were standardly sampled and after appropriate fixation in formalin were systematically processed. All sections were stained with Hematoxylin/Eosin (HE), Periodic Acid Schiff (PAS), Jones Methenamine Silver, and Massons trichrome stain. Glomerulitis and peritubular capillaritis were scored according to the Banff grading scheme, on a maximum of 100 glomeruli.<sup>1</sup> If g+ptc was  $\geq 2$ , it was considered as microvascular inflammation.

#### **Immunohistochemistry:**

##### **SARS-CoV-2:**

Immunohistochemical assays were performed on the Leica BOND-III platform (Leica, Wetzlar, Germany) using formalin fixed-paraffin embedded specimens sectioned at 3 microns onto positively charged glass slides. Immunohistochemical antigen retrieval was performed using BOND Epitope Retrieval Solution 2 (prediluted, pH 9.0; AR 9640) for 20 minutes at 100°C. Specimens were incubated with mouse monoclonal SARS-CoV-2 nucleocapsid antibody (Catalogue# bs-41408P; Bioss, Woburn, MA) for 15 minutes at room temperature, followed by visualization with the Leica Bond detection kit at room temperature (DS 9800). The specimens were then counterstained with hematoxylin.

#### **In situ hybridization**

In situ hybridization was performed with RNAScope (ACD, Newark, CA) using probes directed against SARS-CoV-2 on formalin fixed paraffin embedded tissue sections cut at a thickness of 3 microns. A negative control (bacterial gene *dapB*) was also included to assess background signals as well as positive control probes to the housekeeping gene peptidylprolyl isomerase B (*PPIB*). The ISH sections were counterstained using periodic acid-Schiff. ).

## SUPPLEMENTARY APPENDIX

**Statistical analyses:** Because of small number of subjects (cases) per group, we used non-parametric rank-sum test to compare the groups. All statistical analyses were performed using JMP (SAS Institute, Cary, NC; version 14.1). P-values <0.05 were considered to be statistically significant.

### **TUNEL Assay**

Deparaffinize slides in xylene, and hydrate with graded alcohols to water. Pretreat with Proteinase K, followed by EDTA, dH<sub>2</sub>O wash, and BSA blocking. Follow buffer incubation with reaction mixture (TdT, dUTP & buffer) incubation. Wash with SSC buffer, then incubate with Anti Dig. Visualize using Fuchsin (Red), counterstain with hematoxylin, then dehydrate with graded alcohols, clear in xylene, and mount in permount.

### **Transmission electron microscopy**

Tissue was fixed in Trump's fixative (1% glutaraldehyde and 4% formaldehyde in 0.1 M phosphate buffer, pH 7.2 (1). Tissue was then rinsed for 30 min in 3 changes of 0.1 M phosphate buffer, pH 7.2, followed by a 50 minute postfix in 1% OsO<sub>4</sub>. After rinsing in 3 changes of distilled water for 30 min the tissue was *en bloc* stained with 2% uranyl acetate for 30 min. After *en bloc* staining, the tissue was rinsed in three changes of distilled water, dehydrated in progressive concentrations of ethanol and 100% acetone and embedded in epoxy resin. Thin (90 nm) sections were cut, placed on 200 mesh copper grids and stained with lead citrate. Images were taken on a JEOL 1400 plus electron microscope operating at 80KV.<sup>2</sup>

### **Mass Cytometry**

#### ***Tissue Staining***

All tissue staining and slide preparation was performed by the Mayo Clinic Pathology Research Core. Formalin fixed paraffin embedded tissue sections derived from COVID 19 autopsy renal blocks were stained with our full antibody panel (**Table S1**). The metal tagged antibodies were acquired directly from the manufacturer Fluidigm. Briefly, slides were baked for 60 minutes in a 60°C oven and then cooled for 5 minutes before loading on to a Bond RX autostainer (Leica) for automated slide preparation prior to staining. Slides were deparaffinized with xylol and rehydrated through a graded alcohol series and were blocked with Superblock solution (ThermoFisher) before a final wash with PBS supplemented with 0.05% Tween and 1% BSA (PBS-TB). Slides were manually stained overnight in a humidity chamber at 4°C with a cocktail of the antibodies diluted at the indicated dilution factors in Table 1. On the following day, slides were washed with PBS-TB and then stained with an iridium nucleic acid intercalator (Fluidigm)

## SUPPLEMENTARY APPENDIX

to label cell nuclei. Cells were washed with PBS-TB twice before a final wash with water and drying for 20 minutes at room temperature.

### ***Imaging Mass Cytometry Data Acquisition***

Data acquisition was performed on a Helios time-of-flight mass cytometer (CyTOF) connected to a Hyperion Imaging System (Fluidigm). Optical images of slides were acquired prior to laser ablation using the Hyperion software (version 7.0.5189.0). Ablations were performed at a resolution of 1 micron and at a frequency of 200 Hz. Two to four regions of interest were acquired on consecutive days for 3 days. Performance stability was ensured through calibration using a 3 element full coverage tuning slide embedded with the 3 metal elements 89Y, 140Ce and 175 Lu (Fluidigm). All metals are within the mass range of the time-of-flight detector. Images from the renal cortex sections were generated using the MCD Viewer software (version 1.0.560.2; Fluidigm). Additional formatting and layout of images was performed using Adobe Photoshop (version 19.1.3).<sup>3</sup>

### ***Imaging Mass Cytometry Tissue and Cellular Segmentation Image Analysis Methods***

Image analysis was performed using a customized algorithm within Definiens Developer version 2.7. Imaging Mass Cytometry channels were normalized using a z-score, and combinations of markers with corresponding thresholds were used to identify kidney tubules (Pank and E-Cadherin) from inter-tubular stroma (collagen, aSMA), from Glomeruli (Vimentin). Following tissue-level segmentation, cell segmentation was performed using the DNA intercalator as a marker of individual cells, with a watershed to separate closely-packed cells. Cells were then classified using a supervised approach, in which thresholds / gates were defined to separate immune cell types from one another. The presence of CD3 and CD4 was used to denote CD4+ T cells, and likewise for CD3/CD8a for CD8a+ T cells. Macrophages were identified with CD68, NK cells with Granzyme B, and HLA-DR+ cells were also identified using the same approach. The number of cells within each tissue region (kidney tubules versus inter-tubular stroma) were summed across the whole region of interest, and the percentage of each cell type (relative to all cells identified within that compartment) was calculated for each of the ROIs within distinct patient samples.

### **Gene expression analysis**

RNA extraction and gene expression analysis were performed as previously described.<sup>4 5 6 7</sup> Briefly, four consecutive 20- $\mu$ m sections were obtained from each formalin-fixed paraffin-embedded (FFPE) block and RNA was isolated using the RNeasy FFPE Kit (Qiagen, Toronto, ON). RNA concentration and purity were measured using a NanoDrop 2000c spectrophotometer (Thermo Fisher Scientific, Waltham, MA). Gene expression was quantified using a NanoString nCounter FLEX Analysis System (NanoString Technologies, Seattle, WA), as per manufacturer's recommendations. Samples were analyzed with the 770-gene nCounter Human Organ Transplant Panel (<https://www.nanostring.com/products/gene-expression-panels/gene-expression-panels-overview/human-organ->

## SUPPLEMENTARY APPENDIX

transplant-panel) plus the 10-gene COVID-19 Panel Plus (<https://www.nanostring.com/COVID19>). Quality control assessment and data normalization were performed using the default settings in nSolver Analysis Software Version 4.0 (NanoString Technologies).

### **Statistical analysis**

Post-normalization differential gene expression analysis was performed using R version 3.6.3 (R Foundation for Statistical Computing, Vienna, Austria). Significant differential expression between COVID-19 cases and control samples was determined using linear regression (lm function in stats package) with a false discovery rate (FDR) threshold of 0.05 (p.adjust function in stats package).

### **Proteomics**

#### **Quantitative proteomics of glomeruli microdissected from FFPE kidney sections**

Formalin-fixed paraffin embedded (FFPE) sections of kidney from five COVID-19 positive autopsy cases, five bronchopneumonia cases and five controls were placed onto polyethylene naphthalate (PEN) membrane glass slides (ThermoFisher Scientific). The tissue sections were heated at 65°C for 60 minutes, deparaffinized in xylene (2 x 10 minutes) followed by absolute alcohol (10 minutes), 95% alcohol (10 minutes), 70% alcohol (10 minutes), water (15 minutes) and dried at room temperature. Tubulointerstitia were microdissected using the ZEISS PALM MicroBeam laser microdissection system. The microdissected tubulointerstitium were heated with 100 µl of lysis buffer (50% trifluoroethanol (TFE) in 300 mM Tris-HCl) at 95°C for 90 minutes. The tissue lysates were cleared by centrifugation at 10,000×g for 15 minutes. Samples were reduced with 5 mM dithiothreitol for 30 minutes at 37°C and alkylated with 25 mM iodoacetamide for 30 minutes in dark. The samples were dried in a vacuum concentrator and trypsin digestion was performed in 10% TFE buffer at 1:20 enzyme to protein ratio and incubated at 37°C overnight. Peptide digests were acidified to a final concentration of 1% TFA and cleaned using SDB-RPS stage tips. Peptide digests from each sample were resuspended in 100 mM triethyl ammonium bicarbonate buffer and labelled with 16-plex TMTPro reagents as per manufacturer's instructions. The reaction was quenched with 5% hydroxylamine for 15min. TMT-labelled peptides were then pooled, cleaned using C<sub>18</sub> stage tip and dried using speed vac concentrator. Dried peptides were then fractionated by basic pH reverse-phase liquid chromatography (RPLC) using UltiMate 3000 HPLC system (Thermo Fisher Scientific, Waltham, MA). In basic pH-RPLC, TMT labeled samples were resuspended in solvent A (5 mM TEABC, pH 8.5) and fractionated on a C18 XBridge column (5

## SUPPLEMENTARY APPENDIX

um, 250 X 4.6 mm, Waters) using increasing gradient of solvent B (5 mM TEABC, pH 8.5, 90% acetonitrile) on UltiMate 3000 HPLC system (Thermo Fisher Scientific, Waltham, MA). The absorbance of eluted peptides was measured at 280 nm. The total run time was 120 min and 96 fractions were collected, which were subsequently concatenated into 24 fractions. These fractions were then vacuum dried.

### **LC-MS/MS analysis**

Each fraction was suspended in 0.1% formic acid (Solvent A) and analyzed on Orbitrap Eclipse mass spectrometer (Thermo Scientific, San Jose, CA). Dionex Ultimate RSLC 3000 system (Thermo Scientific, San Jose, CA) was used for the online separation of peptides using a 2-column setup. Peptides were first loaded onto a trap column (Thermo Scientific, Acclaim Pepmap 100, 75  $\mu$ m x 2 cm, 5  $\mu$ m C<sub>18</sub> 100A<sup>+</sup>) followed by separation on analytical column (Thermo Scientific, Acclaim PepMap RSLC, 75  $\mu$ m x 50 cm, 2  $\mu$ m C<sub>18</sub>) using a gradient of 8-28% solvent B (80% Acetonitrile, 0.1% formic acid) for 45 min and 28 – 40% solvent B for 7min. MS/MS analysis was performed in a data dependent top speed mode with 2 sec cycle time. Precursor ions within mass range 350-1600 m/z were resolved in Orbitrap mass analyzer with a resolution of 120,000 (at m/z 200). Precursor ions were sequentially isolated in quadrupole with an isolation width of 0.8 Da and subjected to high energy collision dissociation with 35% normalized collision energy (NCE). Product ions were collected using an AGC setting of 100,000 or an injection time of 100 ms and analyzed in the Orbitrap with 30,000 resolution (at m/z 200). Enhanced resolution mode was enabled for TMTpro masses. Additional settings used for the MS/MS analysis were charge state filter of 2-6, minimum precursor threshold of 25,000, monoisotopic precursor selection and dynamic exclusion of 40 sec.

Raw data files were processed using Proteome Discoverer 2.5 version. Protein identification was performed by Sequest search engine using Uniprot human protein sequence database. Database searching was done using tryptic cleavage specificity, two missed cleavages, precursor ion tolerance of 10 ppm and fragment ion tolerance of 0.02 Da. Carbamidomethylation at cysteine, TMTpro reporter mass at lysine and peptide N-terminus were used as static modifications. Oxidation at M and acetylation at protein N-terminus were used as dynamic modifications. Quantitation was performed by reporter ion node which calculates the reporter ion intensities using 20 ppm integration tolerance around the TMT reporter mass. Protein identifications were filtered for a false discovery rate of 1% at protein, peptide and PSM levels.

## SUPPLEMENTARY APPENDIX

**Table S1. Imaging Mass Cytometry Antibody Panel**

| No. | Target          | Tag   | Clone        | Dilution Factor |
|-----|-----------------|-------|--------------|-----------------|
| 1   | Alpha-SMA       | 141Pr | 1A4          | 200             |
| 2   | CD19            | 142Nd | 6OMP31       | 400             |
| 3   | Vimentin        | 143Nd | D21H3        | 100             |
| 4   | CD14            | 144Nd | EPR3653      | 200             |
| 5   | CD16            | 146Nd | EPR16784     | 100             |
| 6   | Pan-Keratin     | 148Nd | C11          | 200             |
| 7   | CD11b           | 149Sm | EPR1344      | 100             |
| 8   | CD45            | 152Sm | 2B11         | 100             |
| 9   | CD11c           | 154Sm | Polyclonal   | 50              |
| 10  | FoxP3           | 155Gd | 236A/E7      | 1:50            |
| 11  | CD4             | 156Gd | EPR6855      | 400             |
| 12  | E-Cadherin      | 158Gd | 24E10        | 50              |
| 13  | CD68            | 159Tb | KP1          | 100             |
| 14  | Vista           | 160Gd | D1L2G        | 50              |
| 15  | CD20            | 161Dy | H1           | 800             |
| 16  | CD8a            | 162Dy | C8/144B      | 100             |
| 17  | CD45RA          | 166Er | HI100        | 100             |
| 18  | Granzyme B      | 167Er | EPR20129-217 | 50              |
| 19  | CD127 (IL-7Ra)  | 168Er | EPR2955(2)   | 100             |
| 20  | Collagen type I | 169Tm | Polyclonal   | 600             |
| 21  | CD3             | 170Er | Poly         | 100             |
| 22  | CD45RO          | 173Yb | UCHL1        | 50              |
| 23  | HLA-DR          | 174Yb | YE2/36 HLK   | 50              |



## SUPPLEMENTARY APPENDIX

**Table S2: Proteins in the proteomic pathway analysis**

| Canonical Pathways                      | Molecules                                                | z-score        |              |                 |
|-----------------------------------------|----------------------------------------------------------|----------------|--------------|-----------------|
|                                         |                                                          | COVID_19/S-AKI | S-AKI/NS-AKI | COVID-19/NS-AKI |
| Sirtuin Signaling Pathway               | ATG3,NAMPT,NDUFA8,NDUFB11,NDUFS8,PCK2,PPID,TIMM17B,TOMM6 | 1.633          | 0.816        | 1.633           |
| Ceramide Signaling                      | CYCS,MRAS,PPP2CB,RRAS                                    | 2              | 0            | 2               |
| Necroptosis Signaling Pathway           | FKBP1A,PPID,SLC25A13,TIMM17B,TOMM6                       | 0.447          | 0.447        | 2.236           |
| Synaptic Long Term Depression           | CACNA2D1,MRAS,PPP2CB,RRAS                                | 1              | 1            | 1               |
| Oxidative Phosphorylation               | CYCS,NDUFA8,NDUFB11,NDUFS8                               | -1             | 0            | -1              |
| mTOR Signaling                          | EIF3L,FKBP1A,MRAS,PPP2CB,RRAS                            | 0              | 1            | 1               |
| EIF2 Signaling                          | EIF3L,HNRNPA1,MRAS,RPL29,RRAS,WARS1                      | 1              | 0            | 0               |
| NRF2-mediated Oxidative Stress Response | AKR1A1,DNAJA3,MRAS,RRAS,TXN                              | 0              | 0            | 1               |

## SUPPLEMENTARY APPENDIX

### REFERENCES

1. Roufosse C, Simmonds N, Clahsen-van Groningen M, et al. A 2018 Reference Guide to the Banff Classification of Renal Allograft Pathology. *Transplantation* 2018;102:1795-814.
2. McDowell EM, Trump BF. Histologic fixatives suitable for diagnostic light and electron microscopy. *Arch Pathol Lab Med* 1976;100:405-14.
3. Chang Q, Ornatsky OI, Siddiqui I, Loboda A, Baranov VI, Hedley DW. Imaging Mass Cytometry. *Cytometry A* 2017;91:160-9.
4. Adam B, Afzali B, Dominy KM, et al. Multiplexed color-coded probe-based gene expression assessment for clinical molecular diagnostics in formalin-fixed paraffin-embedded human renal allograft tissue. *Clin Transplant* 2016;30:295-305.
5. Adam BA, Smith RN, Rosales IA, et al. Chronic Antibody-Mediated Rejection in Nonhuman Primate Renal Allografts: Validation of Human Histological and Molecular Phenotypes. *Am J Transplant* 2017;17:2841-50.
6. Dromparis P, Aboelnazar NS, Wagner S, et al. Ex vivo perfusion induces a time- and perfusate-dependent molecular repair response in explanted porcine lungs. *Am J Transplant* 2019;19:1024-36.
7. Adam BA, Kikic Z, Wagner S, et al. Intragraft gene expression in native kidney BK virus nephropathy versus T cell-mediated rejection: Prospects for molecular diagnosis and risk prediction. *Am J Transplant* 2020.
